# Supplementary material for: p38γ and p38δ regulate postnatal cardiac metabolism through glycogen synthase 1
Source: PubMed Central journal article supplement (PMC8612745; doi:10.1371/journal.pbio.3001447), 2021-11-10
Supplement: pbio.3001447.s015.pdf [file pbio.3001447.s015.pdf]

Figure 1A

p-p38 $\delta$   
p-p38 $\gamma$

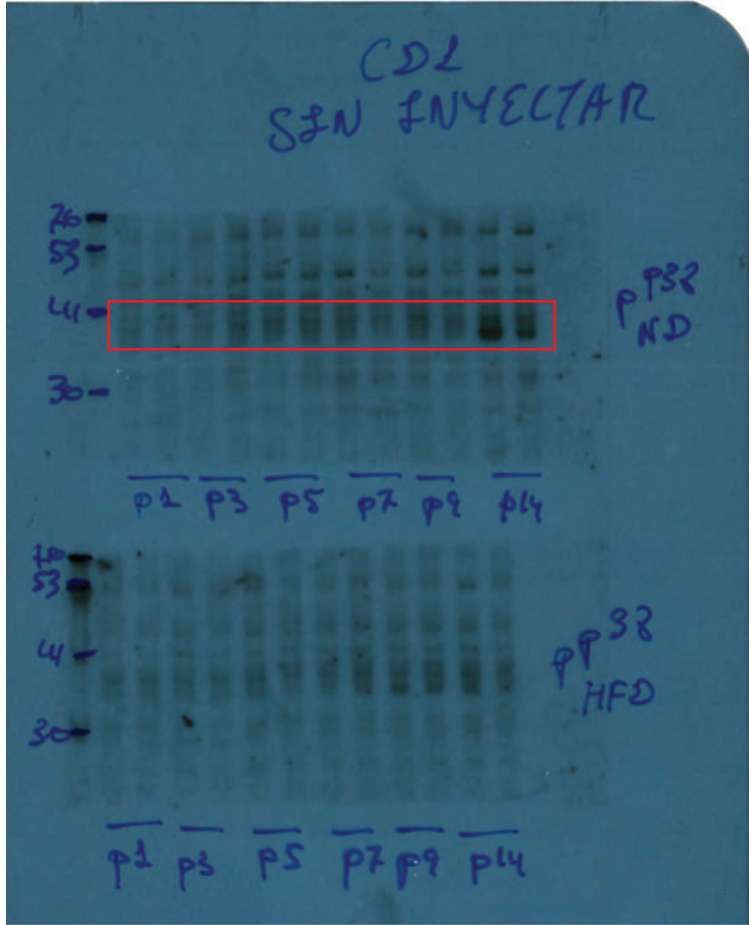

p38 $\gamma$

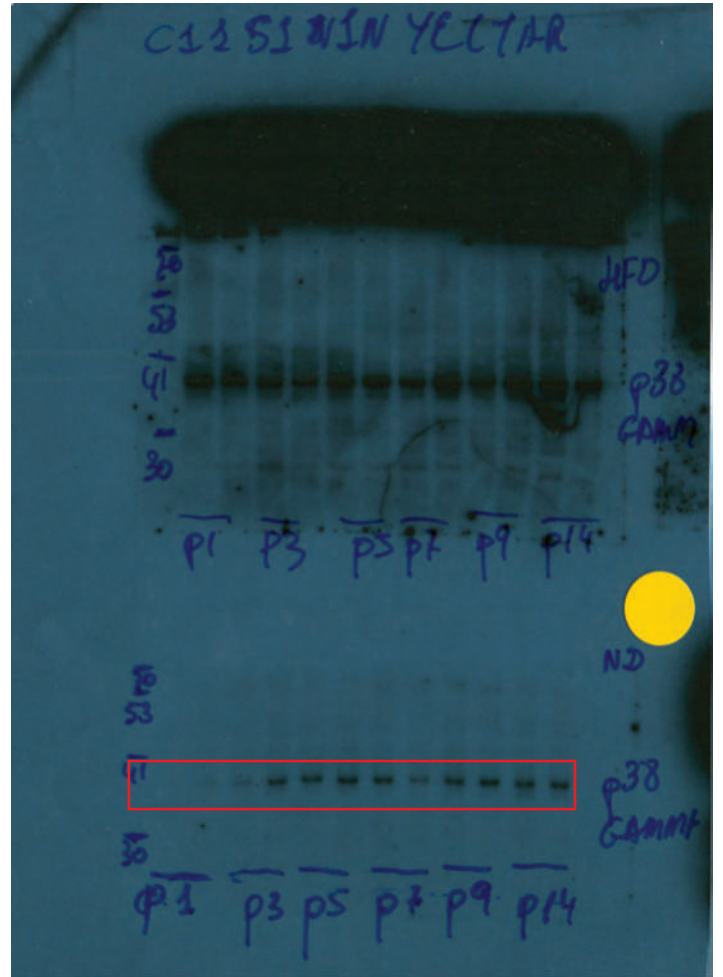

Vinculin

p38 $\delta$

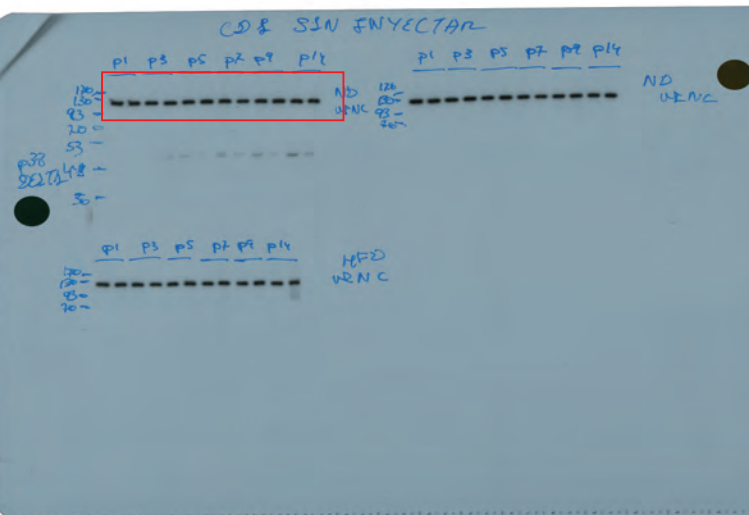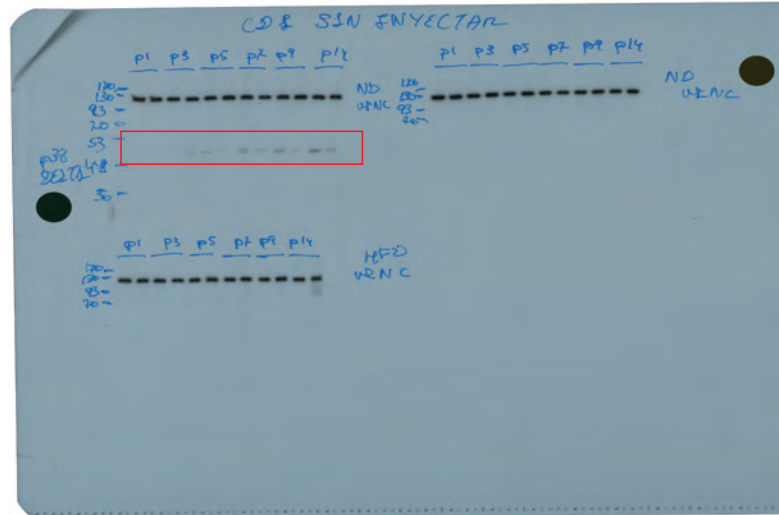

Chemiluminescence Western Blotting  
X ray film detection

Figure 1B

Anti-Flag

Vinculin

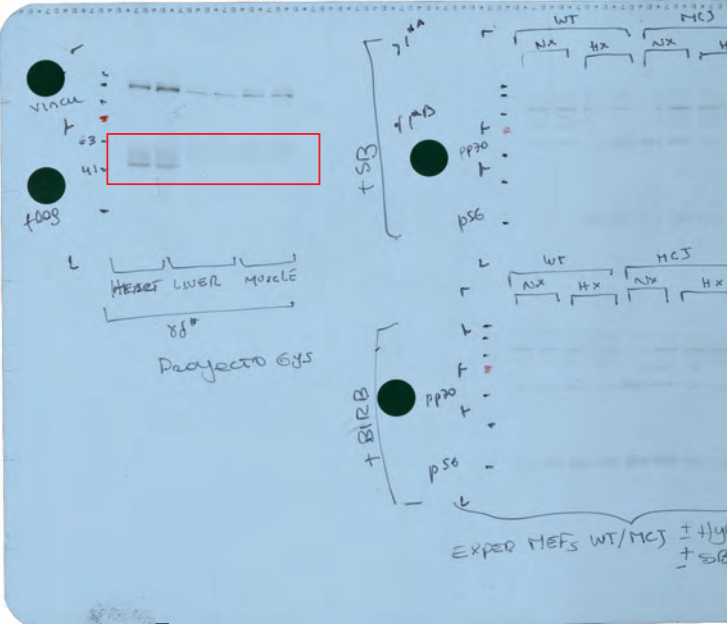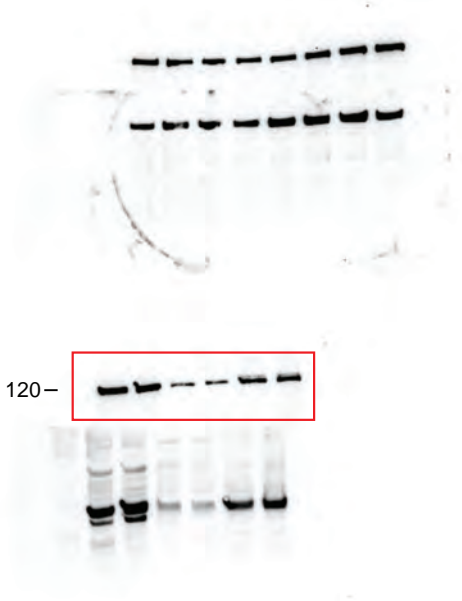

Chemiluminescence Western Blotting  
X ray film detection

Chemiluminescence Western Blotting  
IBright 1500 detection

Figure 4C

Heart

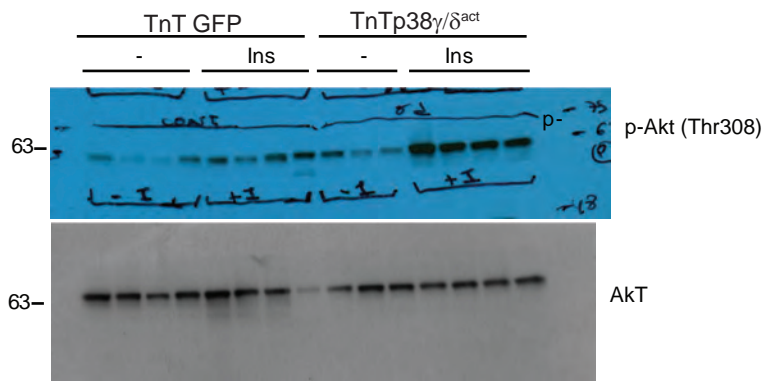

WAT

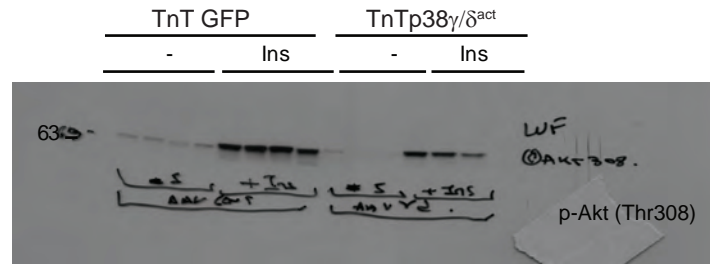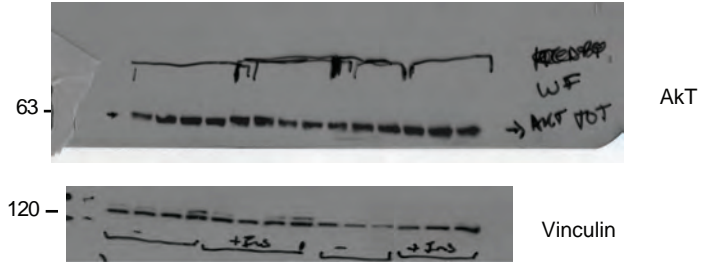

p38 $\gamma^{act}$

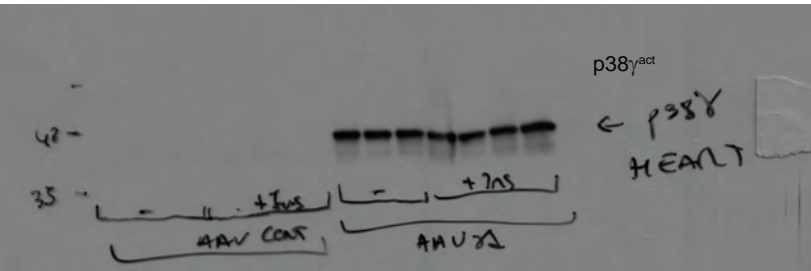

Muscle

| TnT GFP |     | TnTp38 $\gamma/\delta^{act}$ |     |
|---------|-----|------------------------------|-----|
| -       | Ins | -                            | Ins |

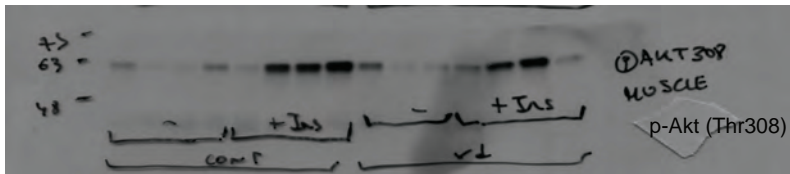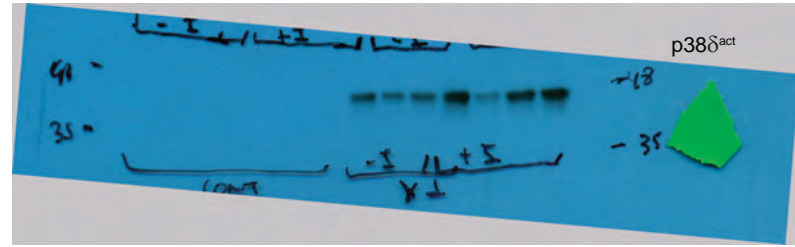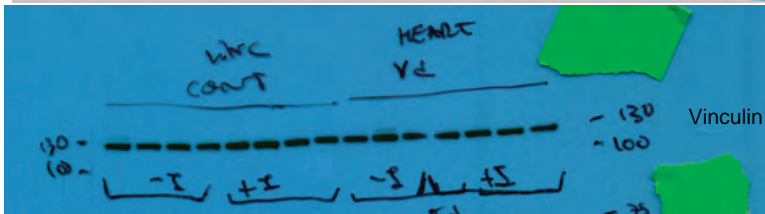

Liver

| TnT GFP |     | TnTp38 $\gamma/\delta^{act}$ |     |
|---------|-----|------------------------------|-----|
| -       | Ins | -                            | Ins |

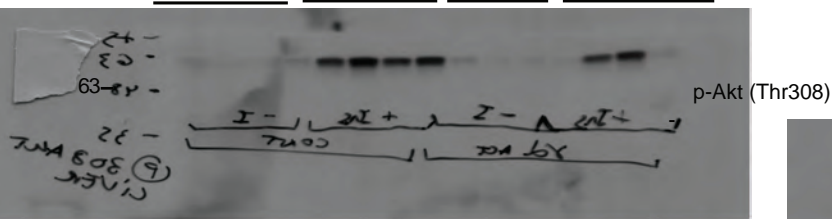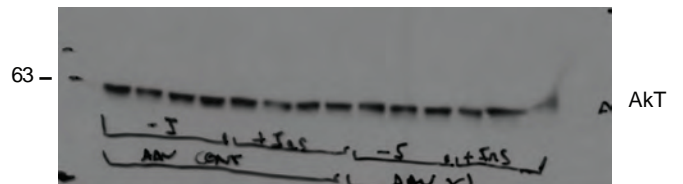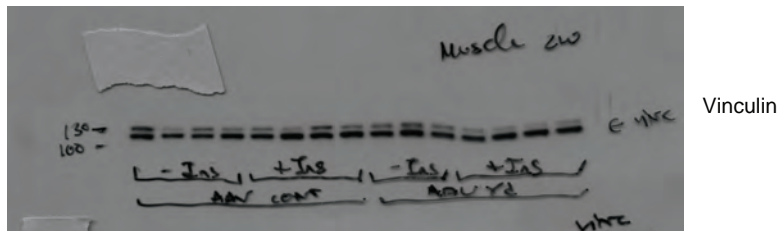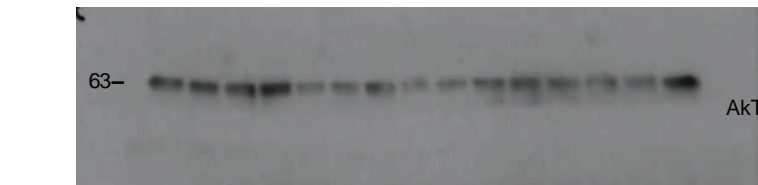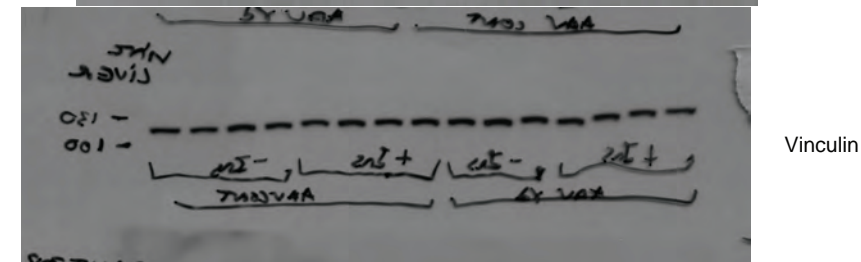

Chemiluminescence Western Blotting  
X ray film detection

Figure 5A

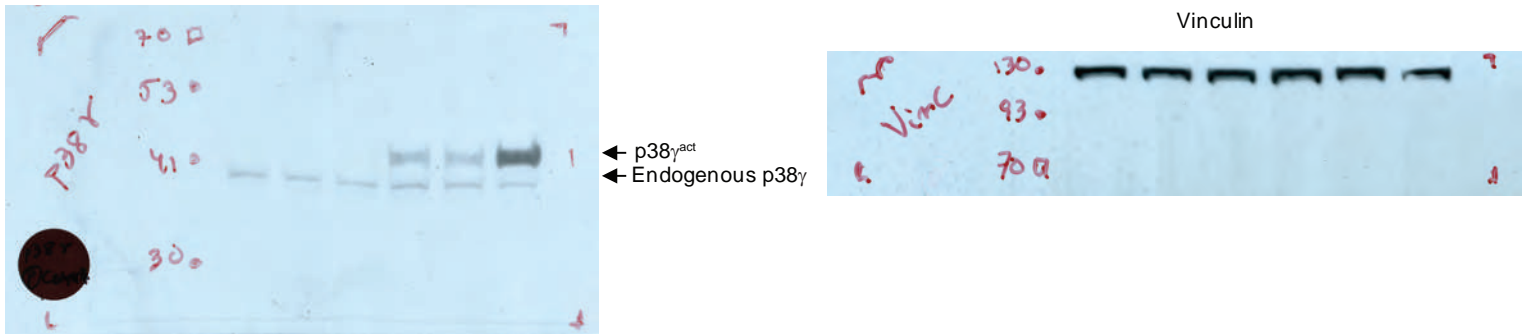

Chemiluminescence Western Blotting  
X ray film detection

Figure 6A

p38 $\gamma$

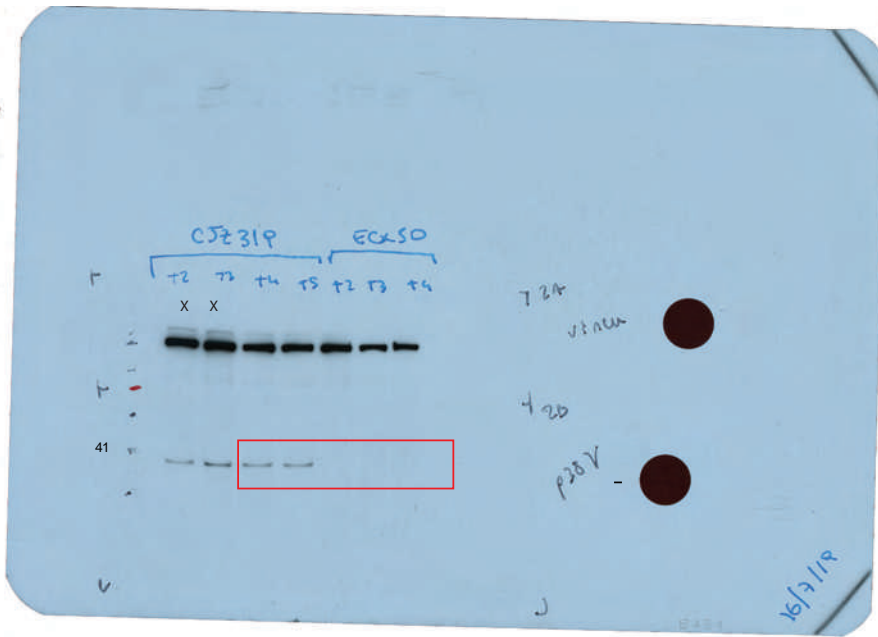

Chemiluminescence Western Blotting  
X ray film detection

p38 $\delta$

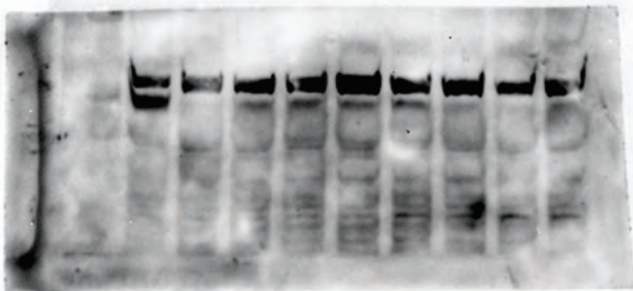

Chemiluminescence Western Blotting  
IBright 1500 detection

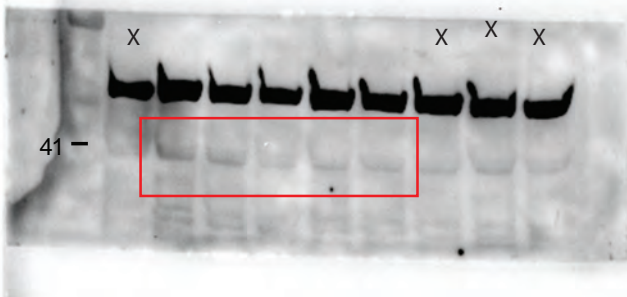

Vinculin

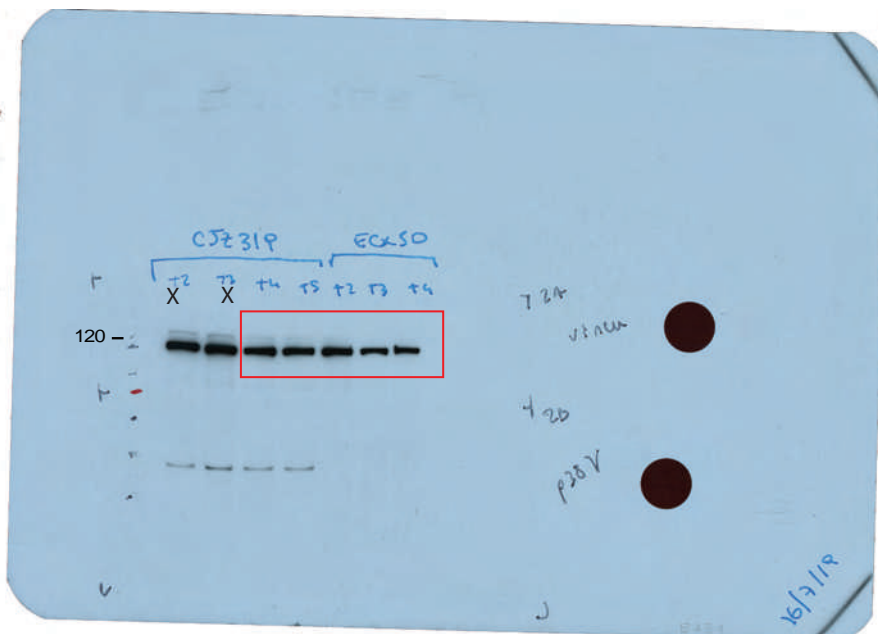

Chemiluminescence Western Blotting  
X ray film detection

# Figure 7A

p-GYS (S641)

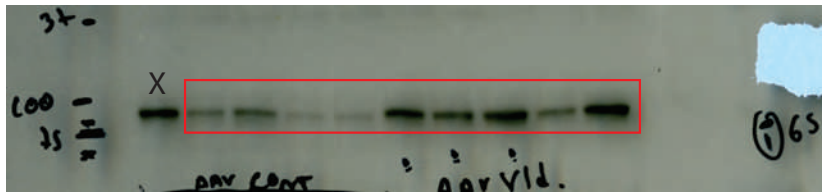

GYS1

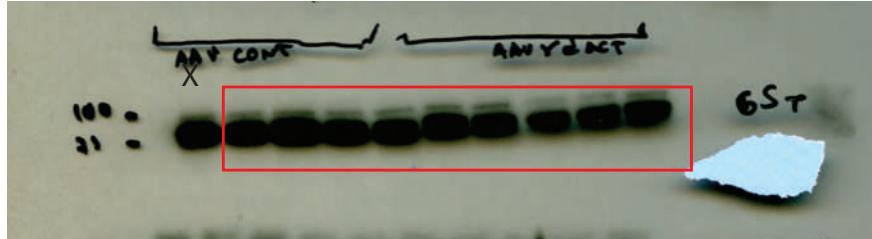

p-GSK3α/β (S21/9)

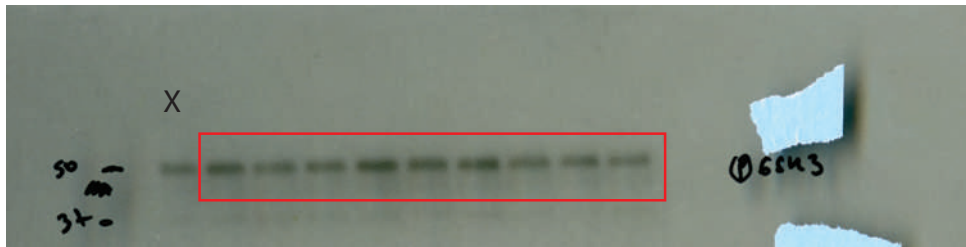

GSK3β

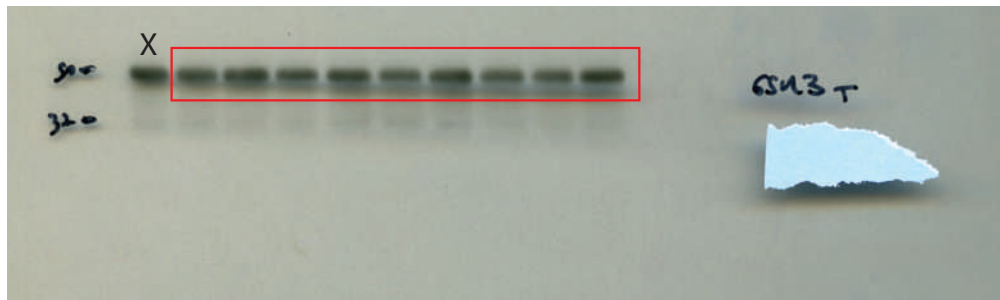

p-Akt(Thr 308)

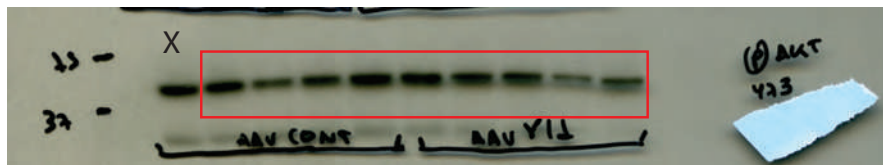

Akt

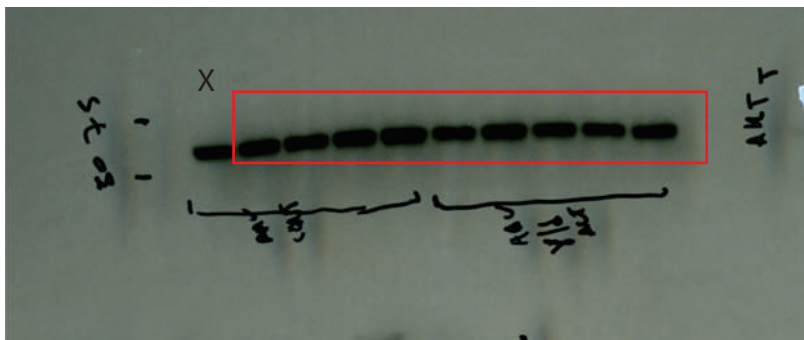

Vinculin

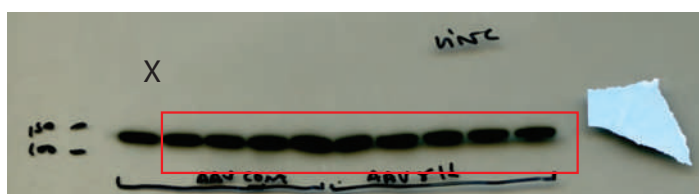

Chemiluminescence Western Blotting  
X ray film detection

Figure 7D

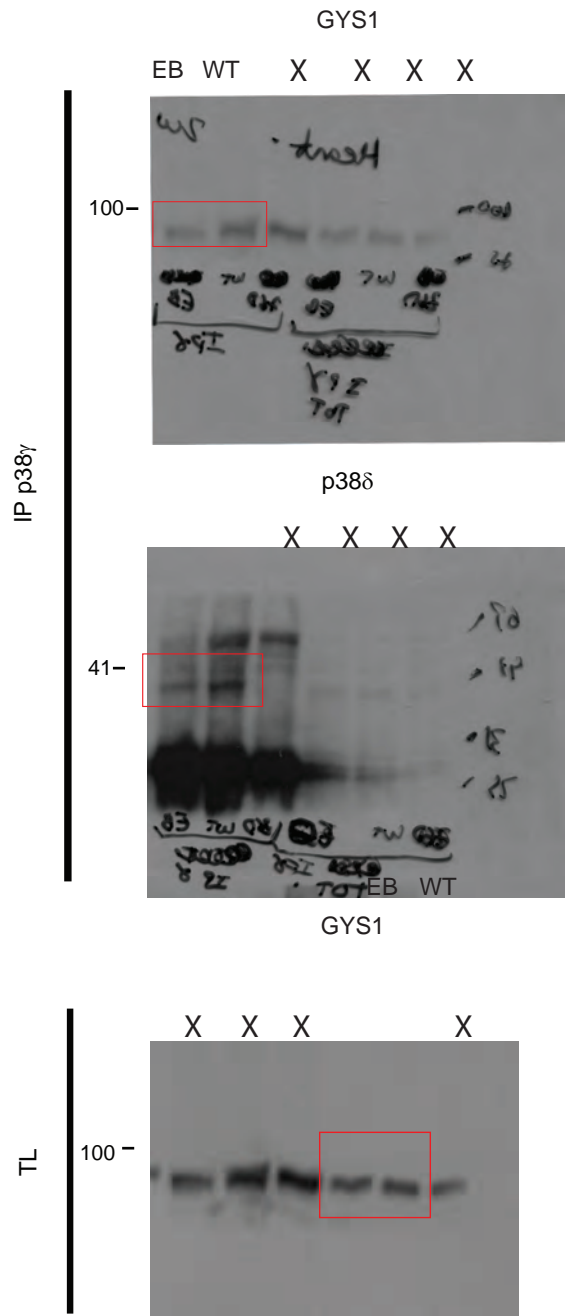

The GYS1 blots are exactly the same gels with different exposure time as the IP and the Total lysate (TL) were charged next to each other

Chemiluminescence Western Blotting  
X ray film detection

Figure 7C

P- Thr-Pro

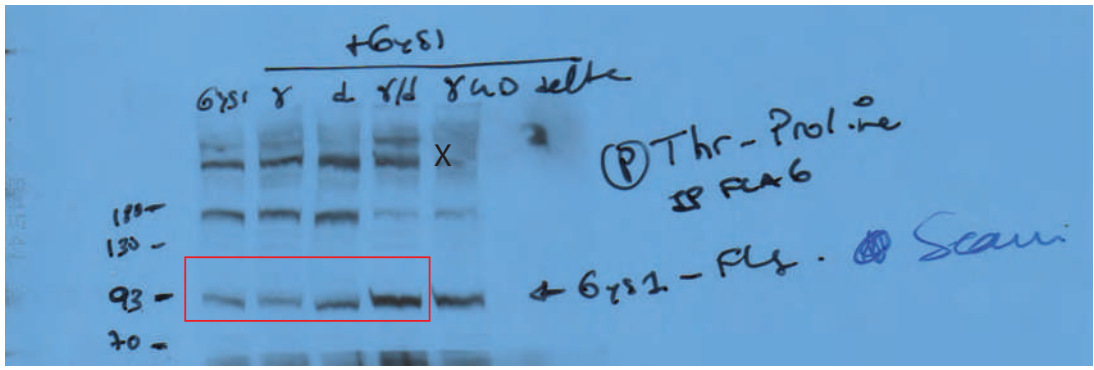

IP-Flag

P- Ser-Pro

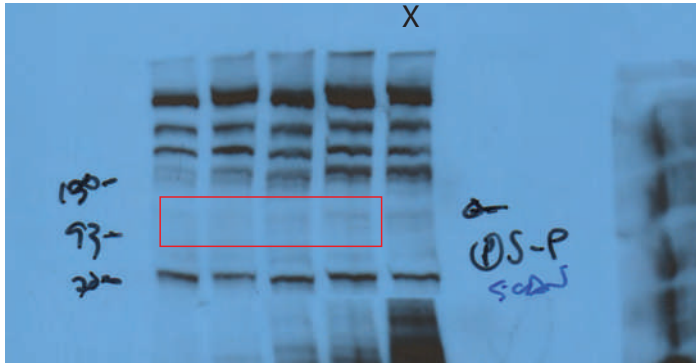

GYS1

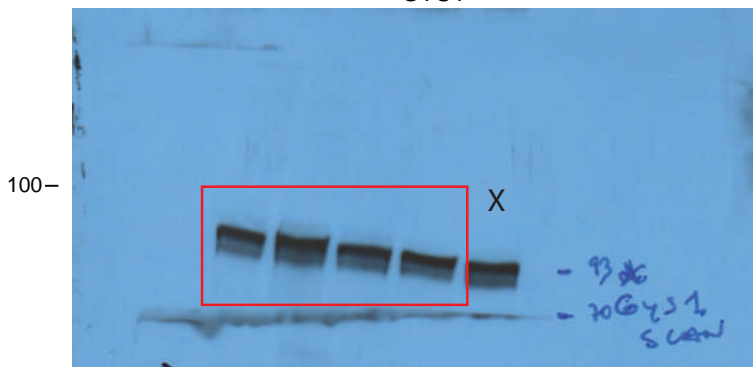

p38 $\delta$

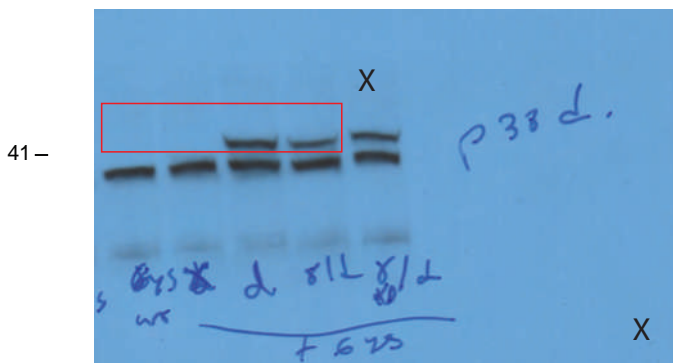

TL

p38 $\gamma$

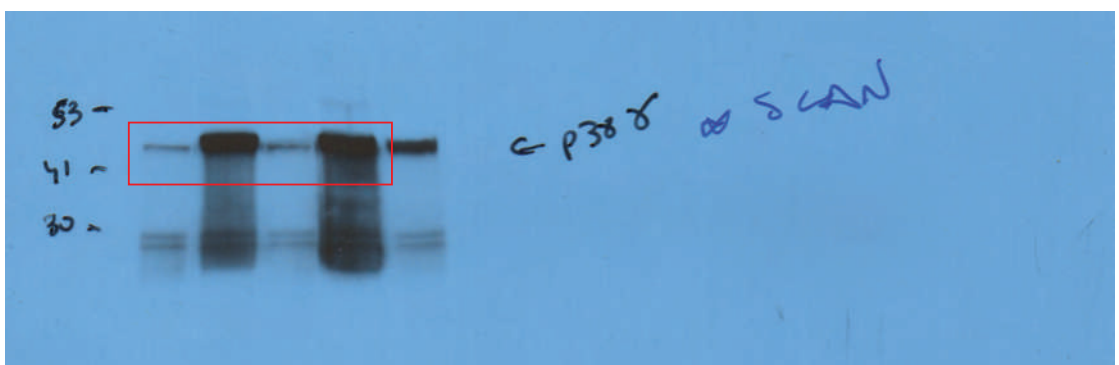

Chemiluminescence Western Blotting  
X ray film detection



Figure 7E

IP- Flag

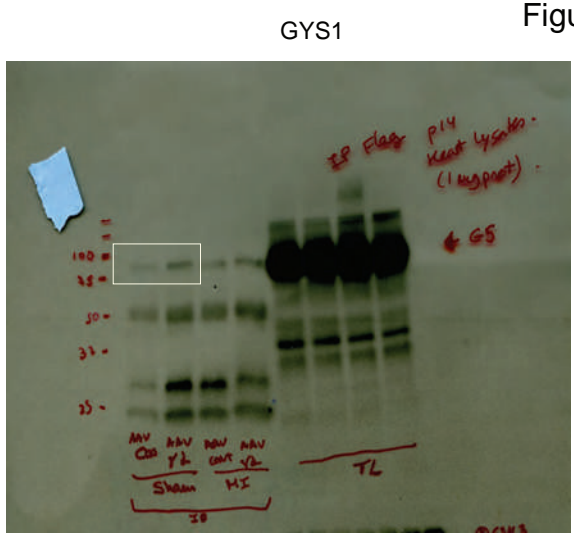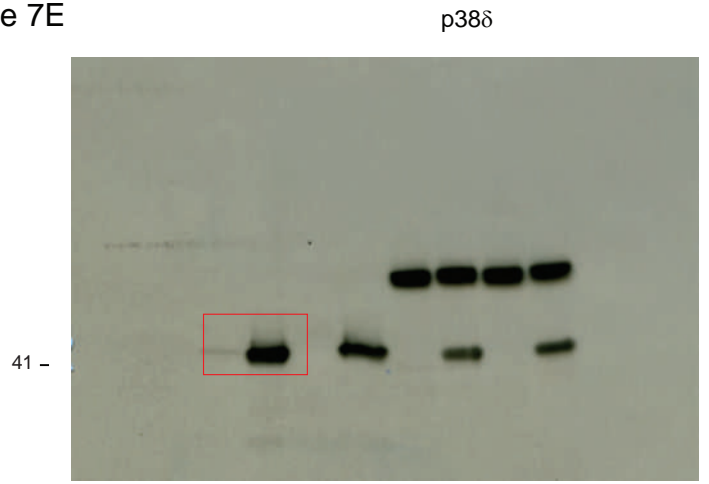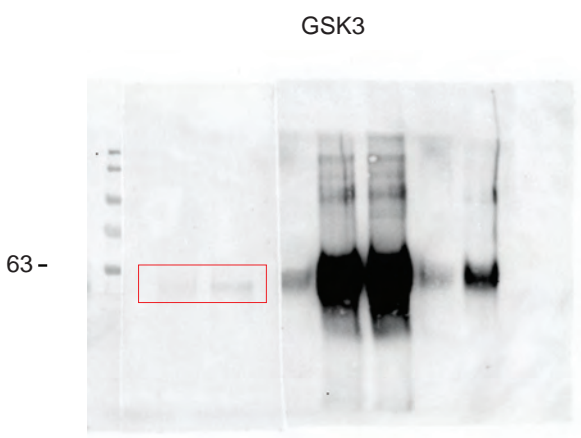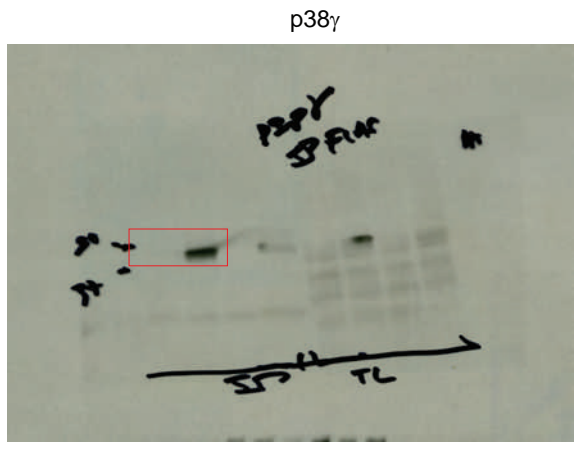

TL

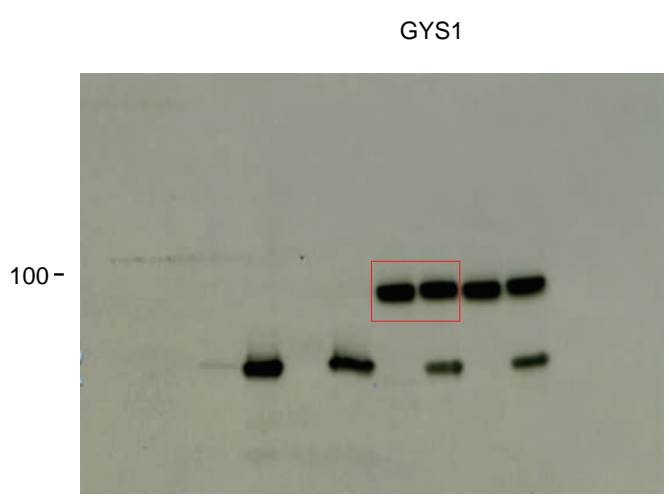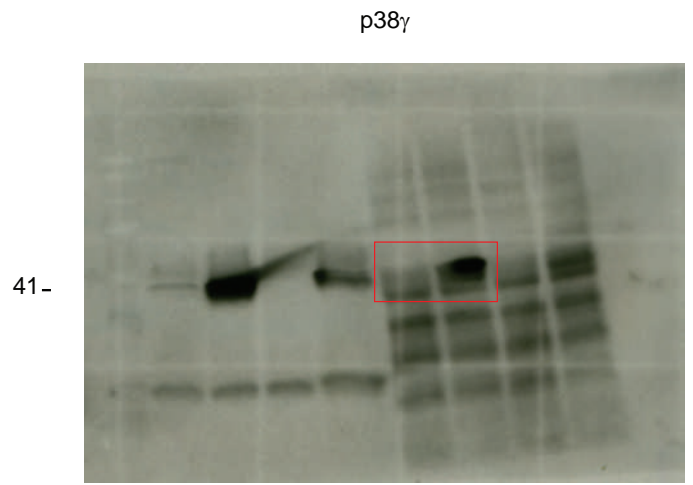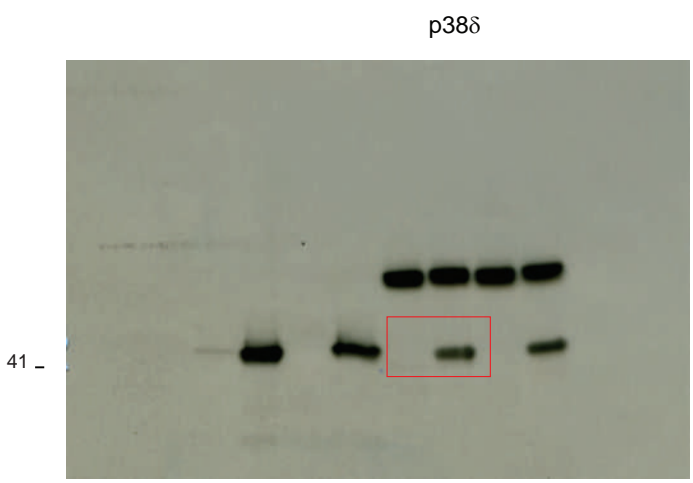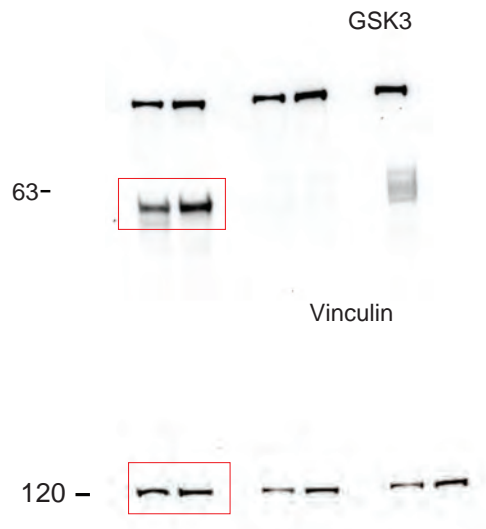

Chemiluminescence Western Blotting  
X ray film and iBright 15000 detection

Figure 7F

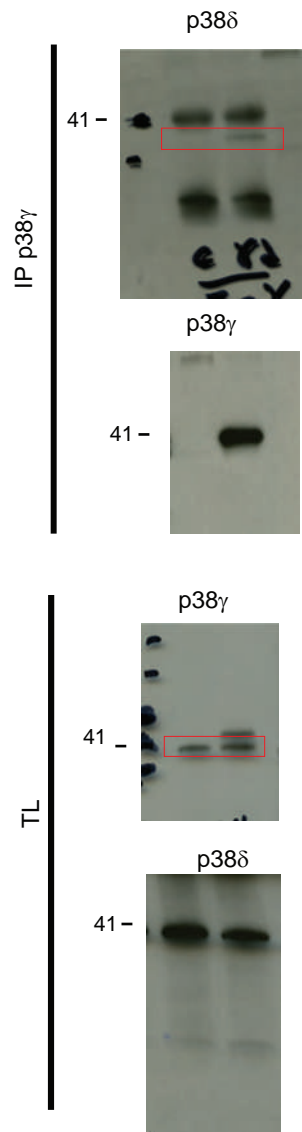

Chemiluminescence Western Blotting  
X ray film detection

Figure 7G

GYS1

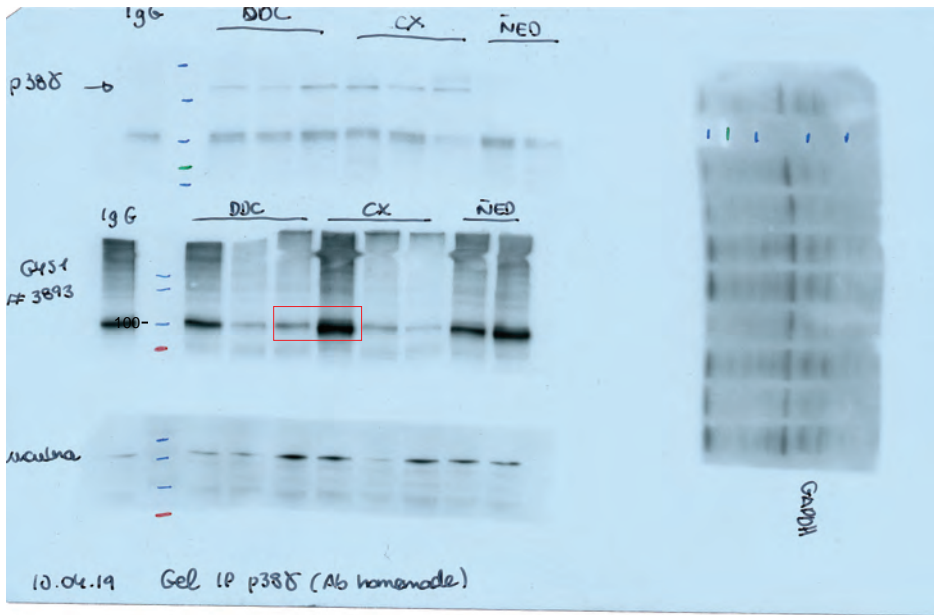

p38 $\gamma$

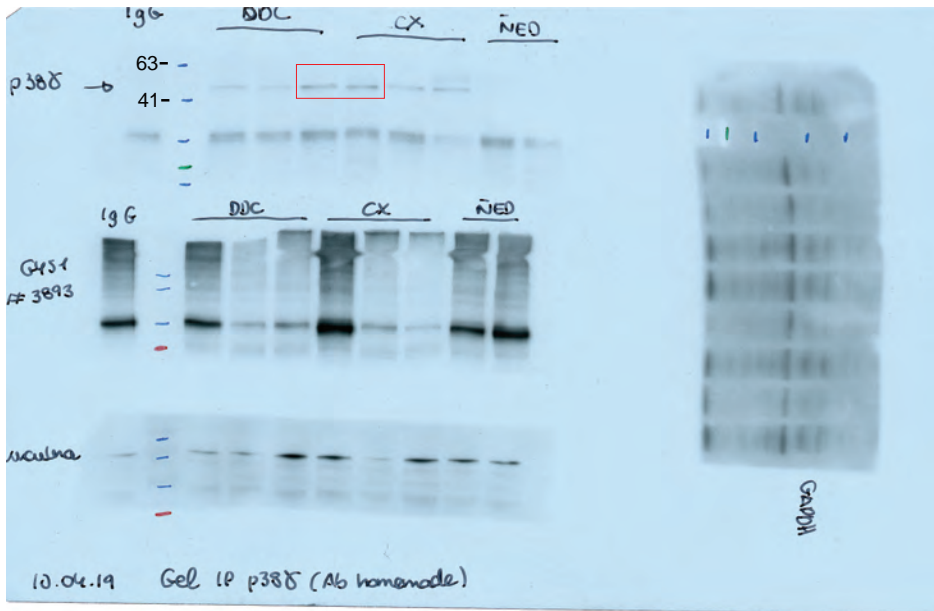

GYS1

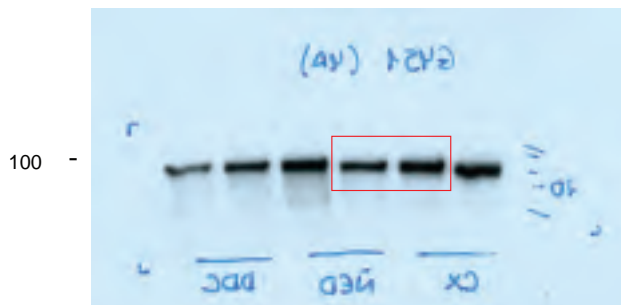

Chemiluminescence Western Blotting  
X ray film detection

IP p38 $\gamma$

TL

Figure 8A

GYS1

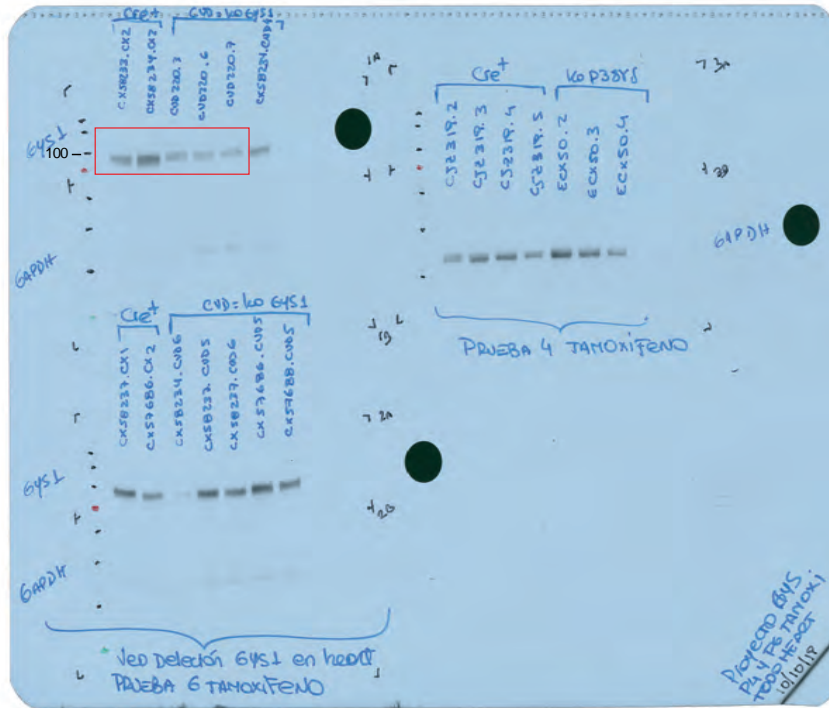

GAPDH

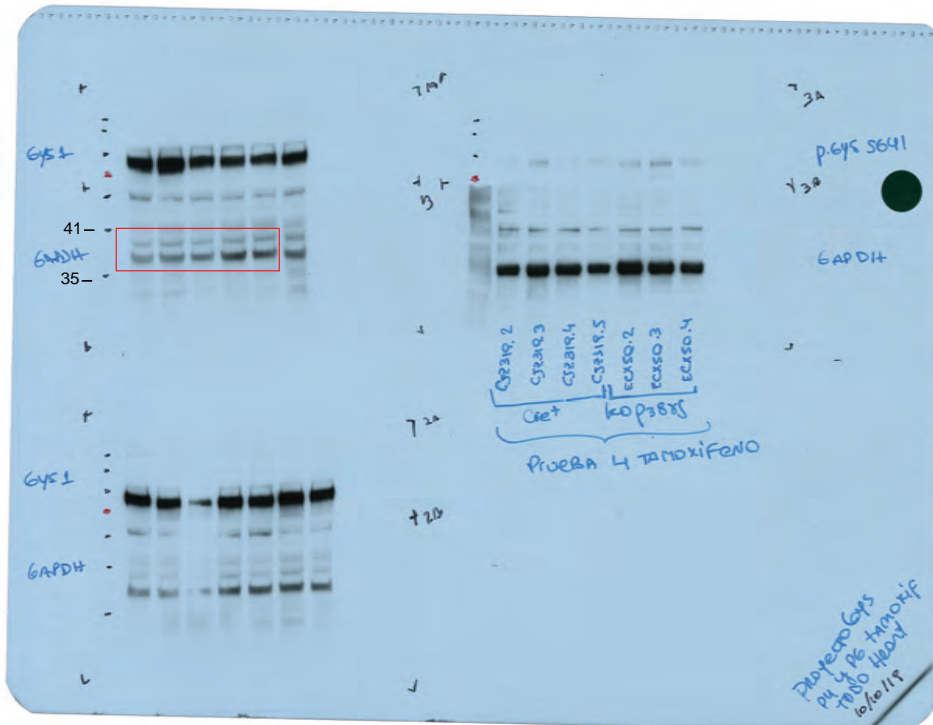

Chemiluminescence Western Blotting  
X ray film detection

Supplementary Figure 4A

p-ACC

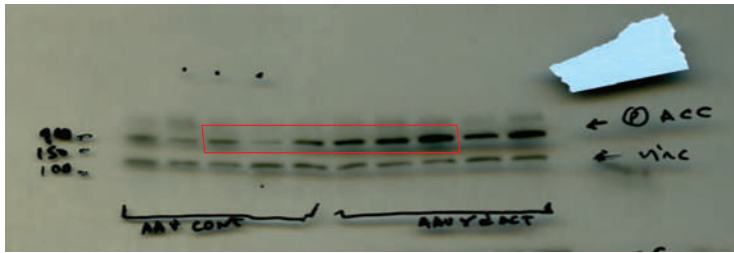

ACC

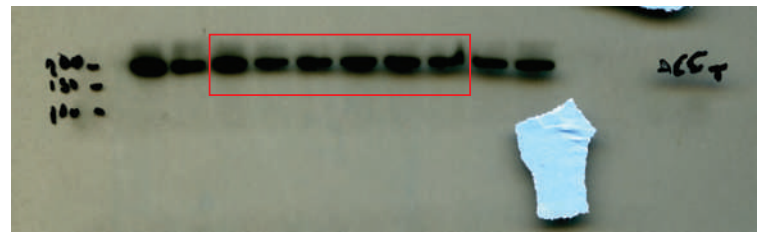

pAMPK(Thr 172)

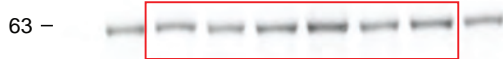

AMPK

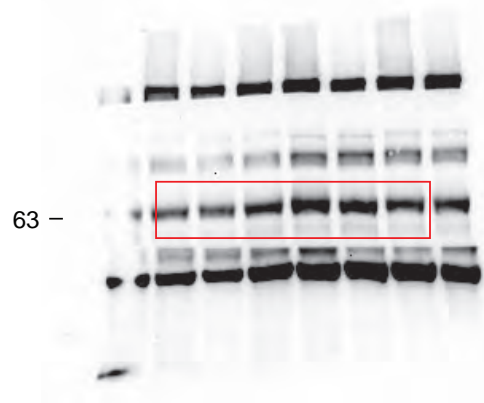

p38 $\delta^{act}$

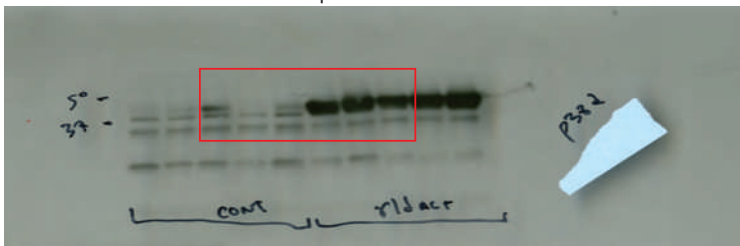

p38 $\gamma^{act}$

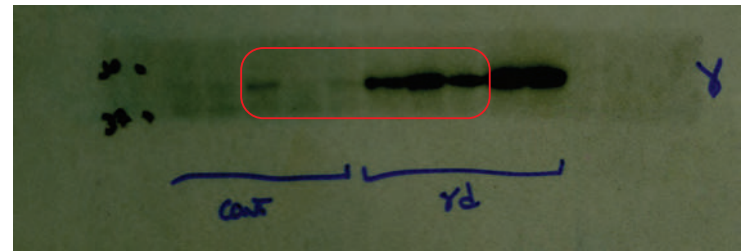

Vinculin

120-

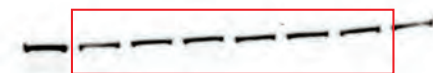

Chemiluminescence Western Blotting  
X ray film and iBright 1500 detection

Supplementary Figure 4C

Mitochondria

p38 $\gamma$

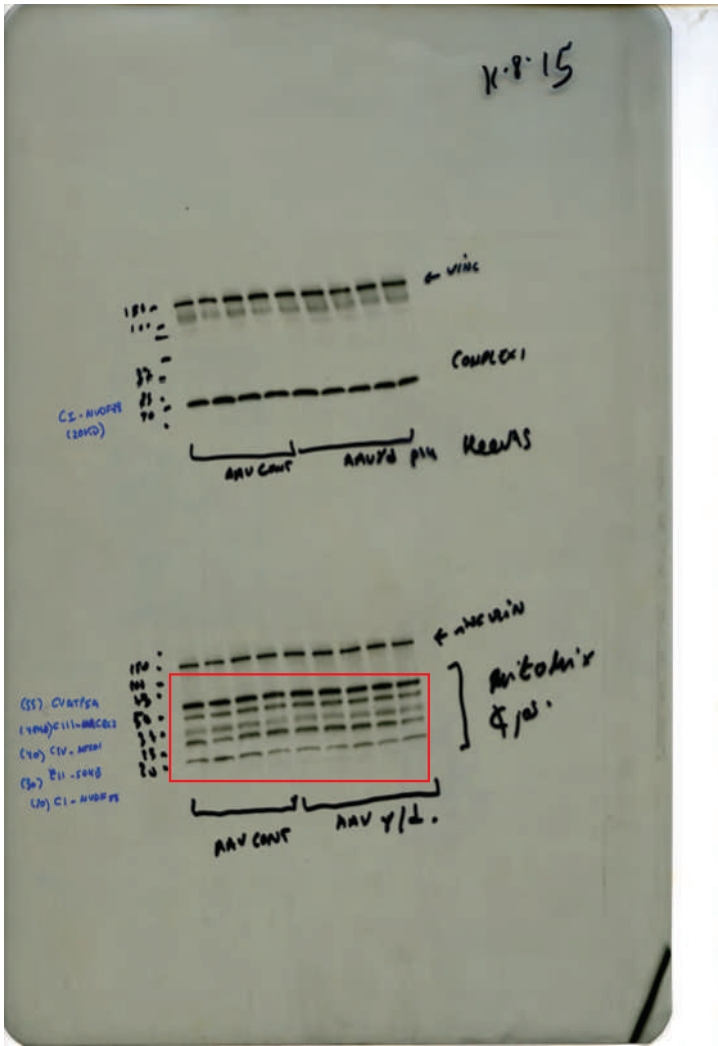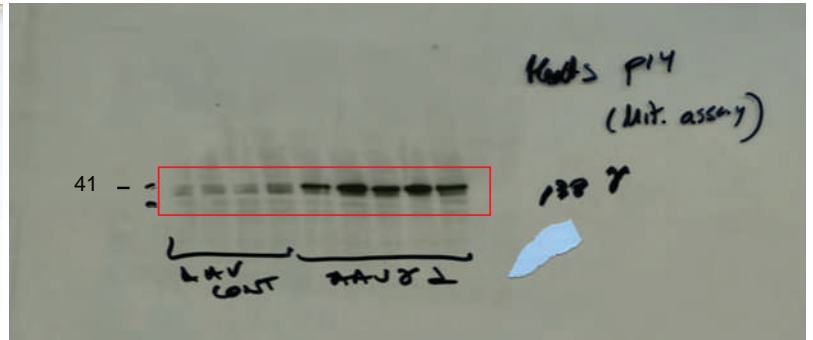

Vinculin

p38 $\gamma$

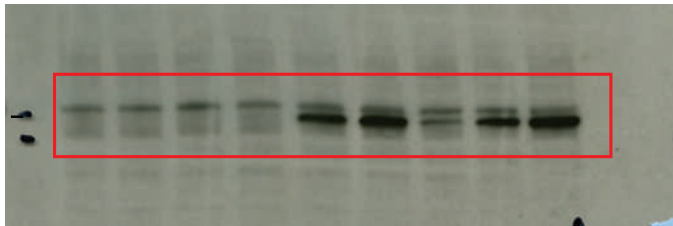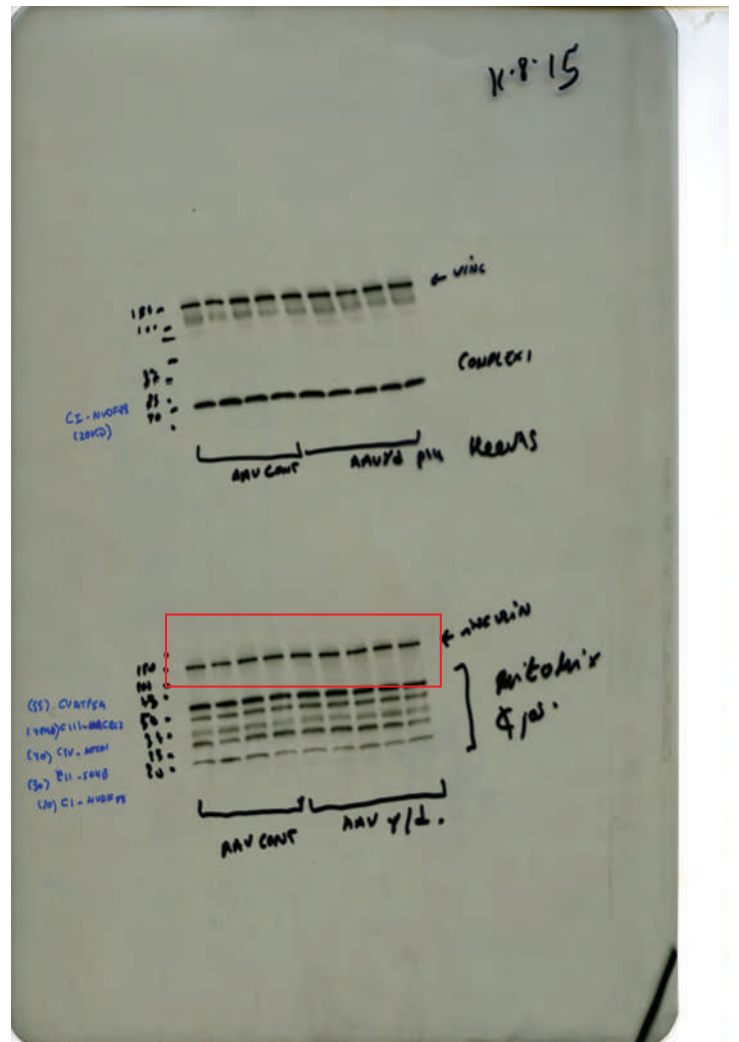

Chemiluminescence Western Blotting  
X ray film detection

Supplementary Figure 5A

Liver

FAS

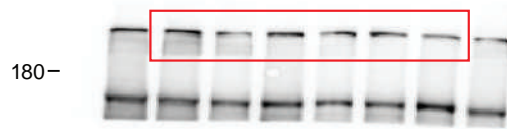

p-AMPK (Thr 172)

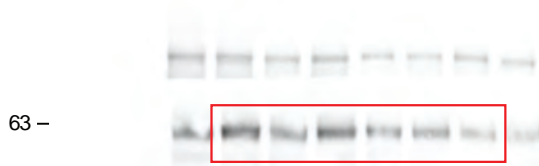

AMPK

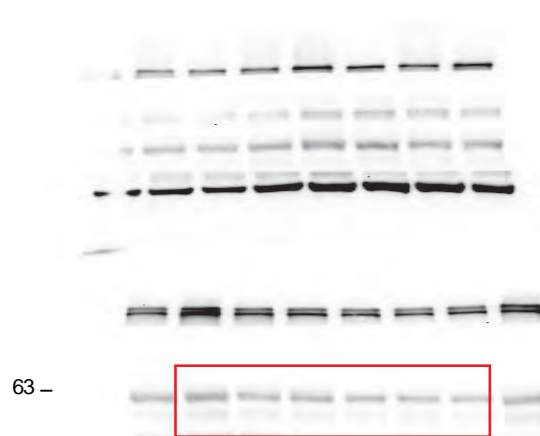

Vinculin

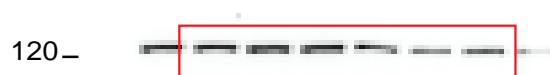

Chemiluminescence Western Blotting  
IBright 1500 detection

PKA

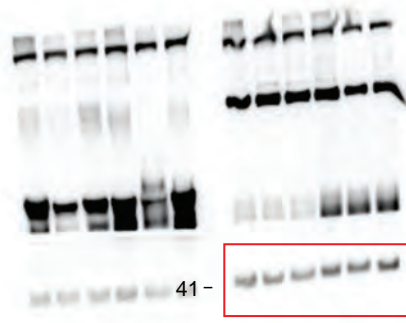

p-HSL (Ser 660)

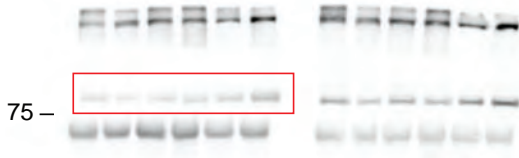

HSL

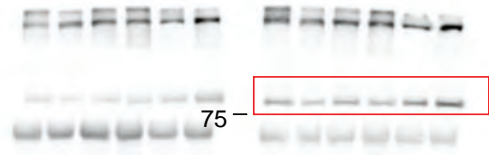

pAMPK (Thr172)

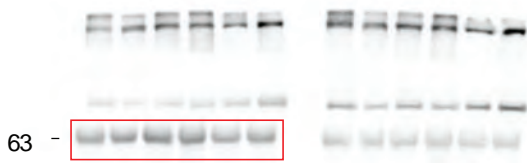

AMPK

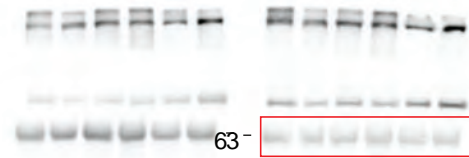

p-ACC (Ser 79)

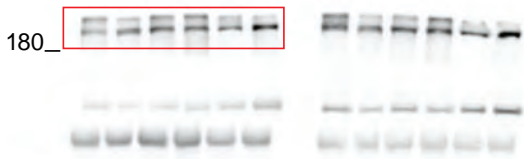

ACC

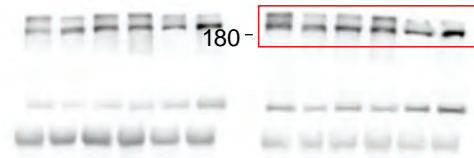

pp38

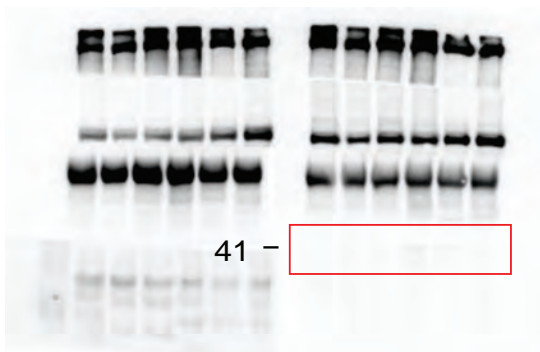

Vinculin

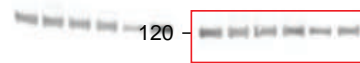

Chemiluminescence Western Blotting  
IBright 1500 detection



Supplementary Figure 7A

p38 $\gamma^{\text{act}}$

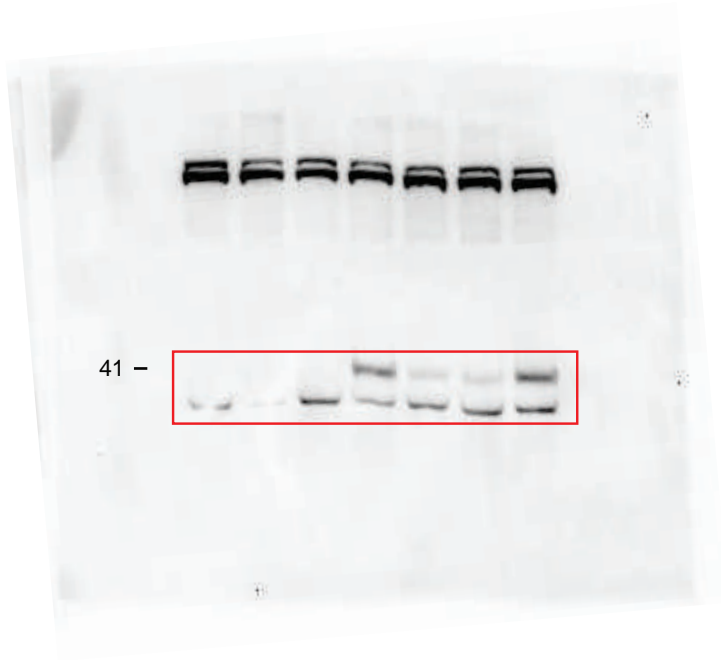

p38 $\delta^{\text{act}}$

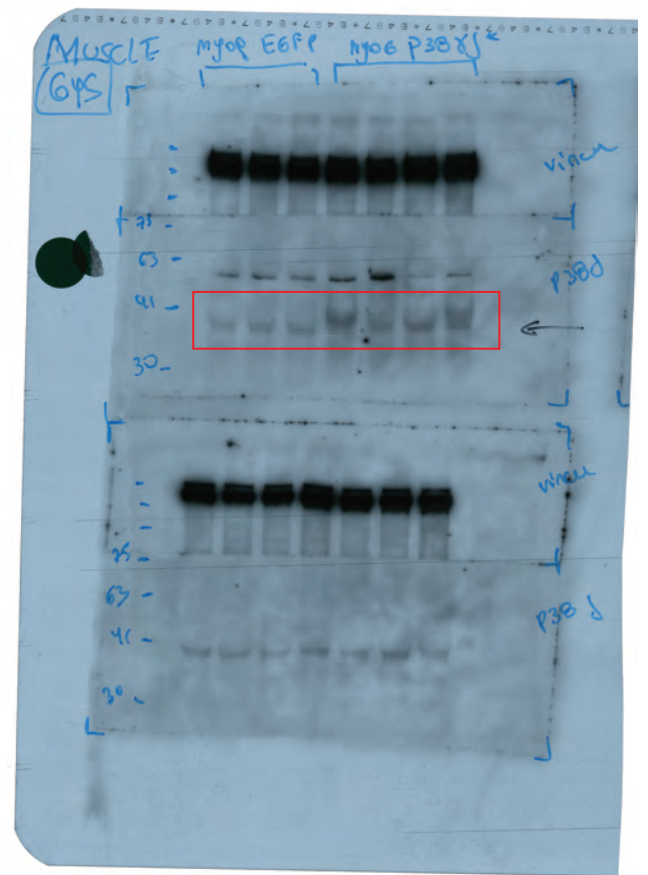

Vinculin

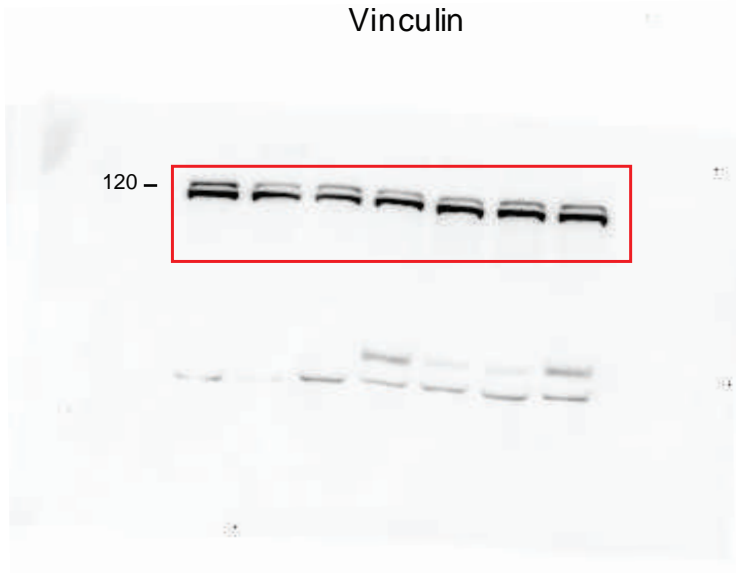

Chemiluminescence Western Blotting X ray film and iBright 1500 detection

Supplementary Figure 10

p-PKA C (Thr197)

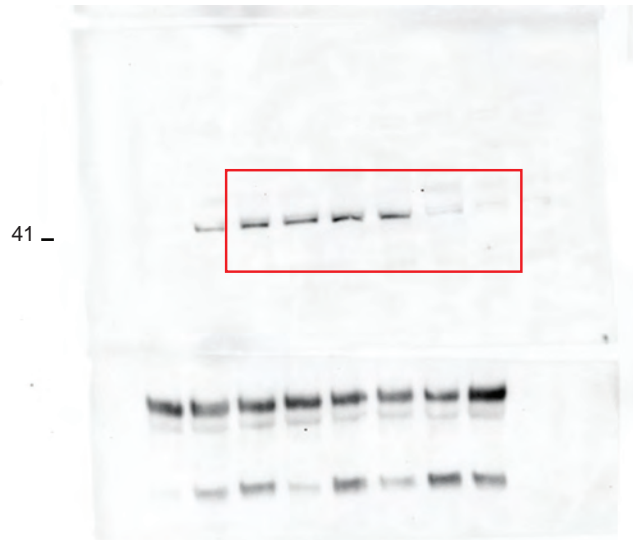

Vinculin

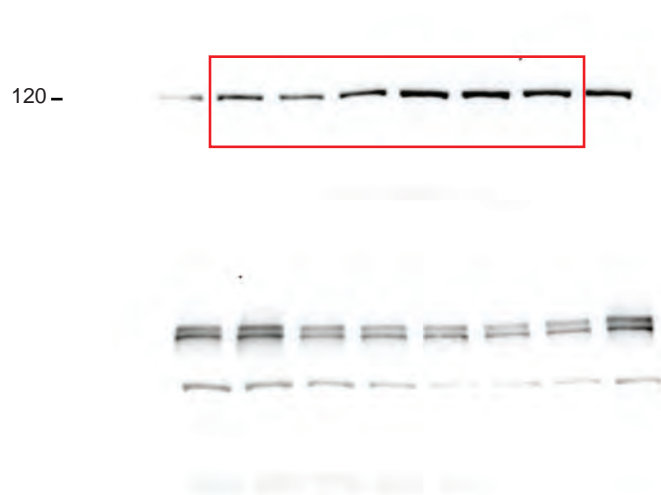

Chemiluminescence Western Blotting  
iBright 1500 detection

Supplementary Figure 12A

p-GYS (S641)

$\beta$ -actin

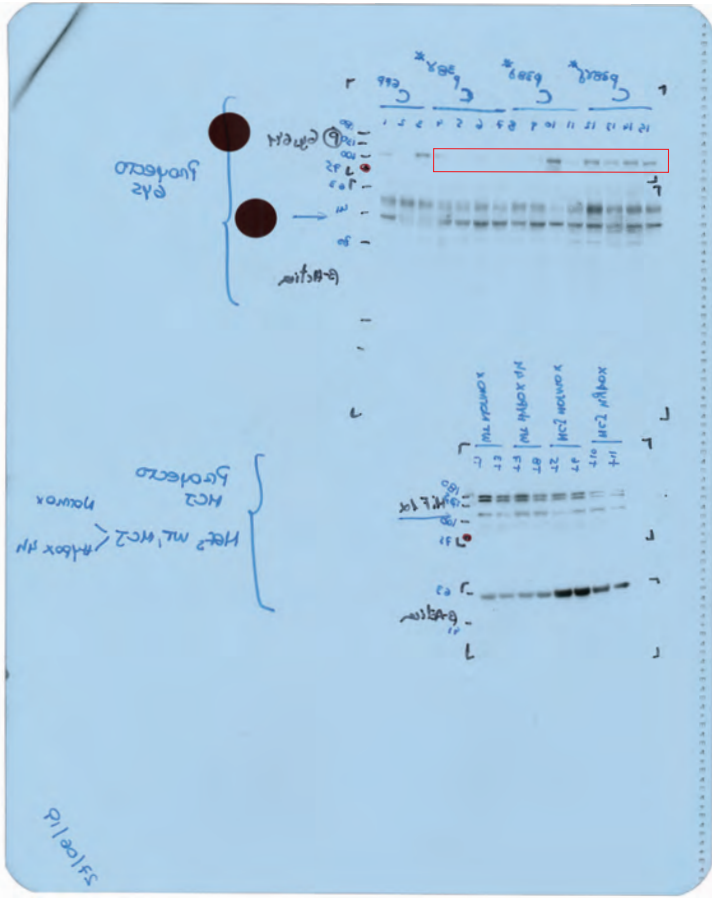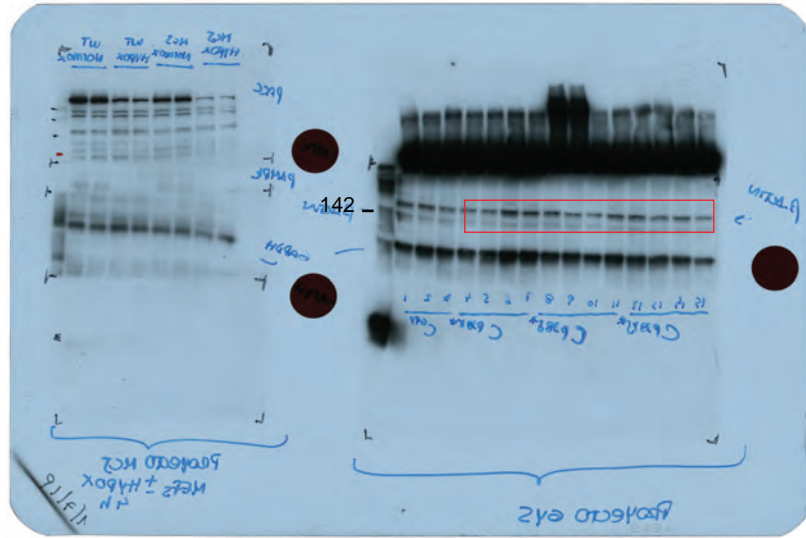

GYS1

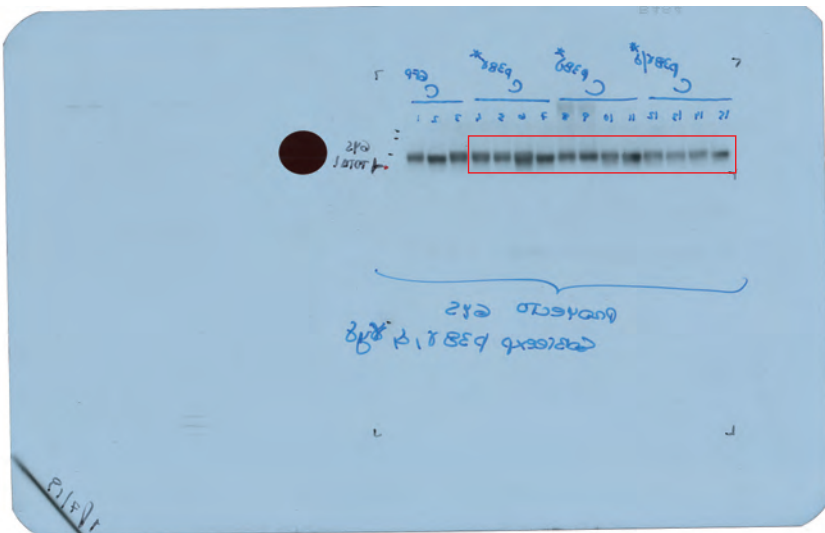

Chemiluminescence Western Blotting  
X ray film detection
